# Supplementary material
Source: Research Square preprint supplement (doi:10.21203/rs.3.rs-9636896/v1)
Supplement: Supplementary file 1 [file 00b3c734fce7e4dc5ea97fca.docx]

**Supplementary Material**

**Table S1: Clinical characteristics of training and testing set in all patients**

|  | **Total (n = 189)** | **Training set (n = 133)** | **Testing set (n = 56)** |
| --- | --- | --- | --- |
| **Age** | 51 ± 11 | 51 ± 11 | 51 ± 11 |
| **BMI** | 24.4 (22.0, 26.7) | 24.2 (22.0, 26.7) | 24.7 (22.3, 26.8) |
| **pCR** |  |  |  |
| **No** | 114 (60) | 80 (60) | 34 (61) |
| **Yes** | 75 (40) | 53 (40) | 22 (39) |
| **cT** |  |  |  |
| **1/2** | 161 (85) | 114 (86) | 47 (84) |
| **3/4** | 28 (15) | 19 (14) | 9 (16) |
| **cN** |  |  |  |
| **0** | 41 (22) | 27 (20) | 14 (25) |
| **1/2/3** | 148 (78) | 106 (80) | 42 (75) |
| **Histology** |  |  |  |
| **Ductal** | 155 (82) | 112 (84) | 43 (77) |
| **Non-ductal** | 34 (18) | 21 (16) | 13 (23) |
| **HR** |  |  |  |
| **Negative** | 84 (44) | 56 (42) | 28 (50) |
| **Positive** | 105 (56) | 77 (58) | 28 (50) |
| **HER2** |  |  |  |
| **Negative** | 93 (49) | 65 (49) | 28 (50) |
| **Positive** | 96 (51) | 68 (51) | 28 (50) |
| **Ki67** |  |  |  |
| **< 30%** | 29 (15) | 21 (16) | 8 (14) |
| **≥ 30%** | 160 (85) | 112 (84) | 48 (86) |

Qualitative data are numbers followed by percentages in parentheses; continuous data are median followed by interquartile range (IQR) in parentheses, except for age. *BMI* body mass index, *HR* hormone receptor, *HER2* human epidermal growth factor receptor 2, *pCR* pathological complete response.

**Table S2: Correlation between metabolism and pCR across molecular subtypes**

| **HR+HER2-** | | | | |
| --- | --- | --- | --- | --- |
|  | **Total (n = 46)** | **non-pCR (n = 42)** | **pCR (n = 4)** | ***P*** |
| **TLR** | 2.9 (2.1, 4.4) | 2.8 (2.0, 3.8) | 4.5 (3.9, 7.0) | 0.15 |
| **cSUVmax** | 7.7 (5.9, 11.1) | 7.4 (5.8, 10.8) | 11.6 (8.9, 17.3) | 0.11 |
| **cSUVmean** | 4.4 (3.3, 6.7) | 4.4 (3.2, 6.5) | 7.1 (5.3, 11.0) | 0.13 |
| **cMTV** | 9.0 (4.5, 16.9) | 9.2 (4.5, 17.4) | 4.9 (4.2, 8.0) | 0.32 |
| **cTLG** | 29.4 (14.8, 99.4) | 29.4 (14.8, 101.4) | 53.5 (19.9, 81.8) | 0.72 |
| **cTLR** | 3.1 (2.3, 4.4) | 2.9 (2.2, 4.3) | 4.9 (3.3, 7.6) | 0.10 |
| **HR-HER2+** | | | | |
|  | **Total (n = 37)** | **non-pCR (n = 9)** | **pCR (n = 28)** | ***P*** |
| **TLR** | 4.4 (3.1, 7.3) | 3.0 (2.1, 4.6) | 5.4 (3.5, 7.9) | 0.04* |
| **cSUVmax** | 10.5 (7.3, 15.9) | 9.6 (6.0, 10.0) | 11.7 (7.5, 16.5) | 0.17 |
| **cSUVmean** | 6.3 (3.8, 9.2) | 5.4 (3.3, 6.1) | 7.2 (4.4, 9.6) | 0.20 |
| **cMTV** | 7.0 (3.9, 10.7) | 5.7 (3.4, 7.2) | 7.3 (4.6, 19.1) | 0.20 |
| **cTLG** | 35.4 (14.8, 73.8) | 11.8 (10.4, 37.7) | 40.6 (21.4, 85.7) | 0.01* |
| **cTLR** | 4.9 (3.2, 6.0) | 4.0 (2.7, 4.3) | 5.3 (3.2, 6.1) | 0.24 |
| **HR+HER2+** | | | | | |
|  | | **Total (n = 59)** | **non-pCR (n = 34)** | **pCR (n = 25)** | ***P*** |
| **TLR** | | 3.5 (2.5, 4.6) | 3.9 (3.4, 5.5) | 3.0 (2.1, 3.5) | 0.009* |
| **cSUVmax** | | 9.2 (6.0, 13.7) | 10.7 (6.6, 15.5) | 8.3 (5.4, 10.7) | 0.04* |
| **cSUVmean** | | 5.4 (3.5, 8.5) | 6.2 (3.7, 9.5) | 4.7 (3.0, 6.1) | 0.04* |
| **cMTV** | | 6.5 (3.6, 12.3) | 8.4 (3.8, 15.0) | 6.1 (3.6, 9.6) | 0.41 |
| **cTLG** | | 25.0 (11.1, 54.6) | 34.6 (12.6, 60.9) | 18.7 (10.4, 39.3) | 0.16 |
| **cTLR** | | 3.9 (2.6, 5.2) | 4.7 (2.9, 6.1) | 3.4 (2.3, 4.3) | 0.03* |
| **TN** | | | | | |
|  | | **Total (n = 47)** | **non-pCR (n = 29)** | **pCR (n = 18)** | ***P*** |
| **TLR** | | 4.7 (2.7, 6.5) | 4.9 (3.2, 6.7) | 3.5 (1.8, 6.1) | 0.17 |
| **cSUVmax** | | 11.2 (8.5, 16.4) | 13.4 (9.8, 20.0) | 9.3 (5.0, 12.9) | 0.02* |
| **cSUVmean** | | 6.8 (5.1, 9.7) | 7.9 (6.0, 12.1) | 5.4 (3.1, 7.8) | 0.03* |
| **cMTV** | | 6.3 (3.8, 8.4) | 6.3 (4.0, 7.3) | 6.4 (3.6, 9.0) | 1.00 |
| **cTLG** | | 26.5 (13.9, 76.1) | 32.3 (18.7, 98.4) | 25.5 (9.4, 58.9) | 0.30 |
| **cTLR** | | 4.7 (3.0, 7.8) | 4.8 (3.8, 8.5) | 3.5 (2.1, 6.4) | 0.049* |

Continuous data are median followed by interquartile range (IQR) in parentheses. *HR* hormone receptor, *HER2* human epidermal growth factor receptor 2, *TN* triple-negative, *pCR* pathological complete response, *SUVmax* maximum standardized uptake value, *SUVmean* mean standardized uptake value, *MTV* metabolic tumor volume, *TLG* total lesion glycolysis, *TLR* tumor-to-liver SUV ratio. Parameters after Combat were denoted with a prefix "c", such as cSUVmax. *P* < 0.05 was highlighted using asterisks.
